# Supplementary material for: Thermoresponsive dynamic BAB block copolymer networks synthesized by aqueous PISA in one-pot
Source: Royal Society of Chemistry journal article supplement (doi:10.1039/d0py01424a), 2021-01-01
Supplement: d0py01424a1.pdf [file d0py01424a1.pdf]

## Supporting Information

### **Thermoresponsive dynamic BAB block copolymer networks synthesized by aqueous PISA in one-pot**

---

Pauline Biais<sup>a</sup>, Marie Engel<sup>a</sup>, Olivier Colombani<sup>b</sup>, Taco Nicolai<sup>b</sup>, François Stoffelbach<sup>a</sup>, Jutta Rieger<sup>a,\*</sup>

<sup>a</sup> Sorbonne Université, CNRS, Institut Parisien de Chimie Moléculaire, UMR 8232, Polymer Chemistry Team, 4 Place Jussieu, 75252 Paris Cedex 05, France

E-mail: [jutta.rieger@sorbonne-universite.fr](mailto:jutta.rieger@sorbonne-universite.fr)

<sup>b</sup> Institut des Molécules et Matériaux du Mans (IMMM), UMR 6283 CNRS Le Mans Université, Avenue Olivier Messiaen, 72085 Le Mans Cedex 9, France

---

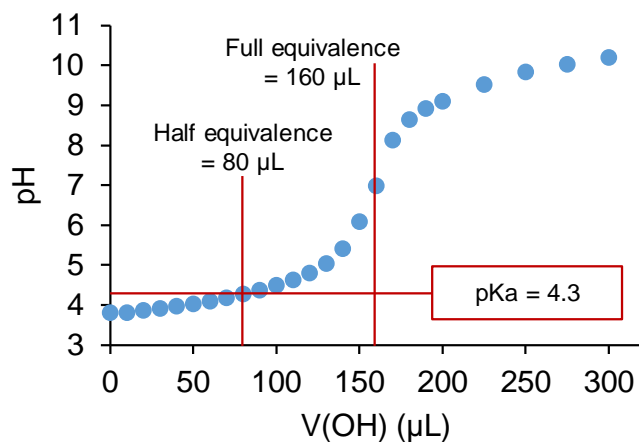

**Figure S1.** Acid titration curve to determine the  $pK_a$  of a  $(C_4\text{-TTC-PDMAc})_2\text{-BA}$  macroRAFT agent ( $M_{n,\text{NMR}} = 8.8 \text{ kg mol}^{-1}$ ). Titration at  $C = 1 \text{ mmol L}^{-1}$  with a NaOH solution ( $C = 10 \text{ mmol L}^{-1}$ ).

**Table S1.** Polymerization conditions and characteristics of the poly(*N,N*-dimethylacrylamide) macroRAFT agents prepared by polymerization of DMAc at  $70 \text{ }^\circ\text{C}$  and natural pH.<sup>a</sup>

| Entry           | $[\text{DMAc}]_0/[\text{RAFT}]_0$ | time (min) | conv. <sup>b</sup> (%) | $\tau^c$ (%) | $DP_{n,\text{th}}^d$ | $M_{n,\text{th}}^d$ ( $\text{kg mol}^{-1}$ ) | $M_{n,\text{NMR}}^e$ ( $\text{kg mol}^{-1}$ ) | $M_{n,\text{PMMA}}^f$ ( $\text{kg mol}^{-1}$ ) | $\mathcal{D}^f$ |
|-----------------|-----------------------------------|------------|------------------------|--------------|----------------------|----------------------------------------------|-----------------------------------------------|------------------------------------------------|-----------------|
| <b>I</b>        | 88                                | 79         | 90                     | 19           | 79                   | 8.4                                          | 8.2                                           | 5.6                                            | 1.14            |
| <b>I bis*</b>   | 115                               | 129        | 73                     | -            | 84                   | 8.9                                          | 9.2                                           | 5.4                                            | 1.21            |
| <b>II</b>       | 197                               | 136        | 93                     | 19           | 182                  | 18.7                                         | 18.5                                          | 11.0                                           | 1.46            |
| <b>II bis</b>   | 197                               | 105        | 90                     | 19           | 177                  | 18.1                                         | 18.4                                          | 11.1                                           | 1.23            |
| <b>III</b>      | 436                               | 115        | 90                     | 18           | 394                  | 39.6                                         | <i>N.D.</i> <sup>g</sup>                      | 34.2                                           | 1.15            |
| <b>I tris**</b> | 110                               | 75         | 88                     | 20           | 97                   | 10.2                                         | 9.8                                           | 6.5                                            | 1.15            |

<sup>a</sup> The polymerizations were started in bulk conditions ( $[\text{DMAc}]_0 = 9.7 \text{ mol L}^{-1}$ ) and at about 50% monomer conversion water was added to dilute the reaction medium by a factor of five.  $[\text{RAFT agent}]_0/[\text{ACPA}]_0 = 10$ . <sup>b</sup> Monomer conversion determined by  $^1\text{H NMR}$ . <sup>c</sup> Final solids content,  $\tau_{\text{polym}} = m_{\text{polymer}}/m_{\text{tot}} = [m(\text{DMAc})_0 \times \text{conv.} + m(\text{RAFT})_0]/m_{\text{tot}}$ . <sup>d</sup> Theoretical number-average molar mass,  $M_{n,\text{th}}$ , and number-average degree of polymerization,  $DP_{n,\text{th}}$ , calculated using the experimental conversion. <sup>e</sup> Number-average molar mass  $M_{n,\text{NMR}}$ , determined by  $^1\text{H NMR}$ . <sup>f</sup> Number-average molar mass  $M_{n,\text{PMMA}}$  and dispersity,  $\mathcal{D}$ , determined by SEC in DMF (+ LiBr  $1 \text{ g L}^{-1}$ ) with a PMMA calibration. <sup>g</sup> The number-average molar mass  $M_{n,\text{NMR}}$ , could not be determined by  $^1\text{H NMR}$ . \* Sample I bis was prepared in DMF according to the protocol described in our previous work.<sup>1</sup> \*\* I tris has a slightly higher  $DP_n$  than I and I bis. It was only used for preliminary tests, see **Table S2** and **Figure S3**.

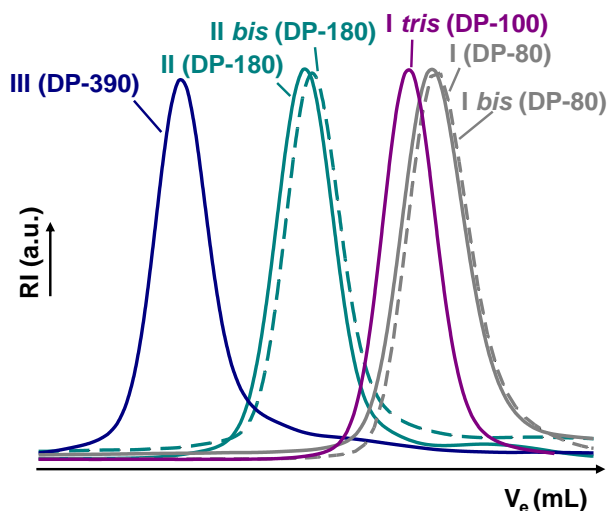

**Figure S2.** SEC chromatograms in DMF of the PDMAc macroRAFT agents (see **Table S1**).

**Table S2.** Experimental conditions and results for aqueous dispersion copolymerizations of DAAM and DMAc in the presence of PDMAc macroRAFT agent I *tris* synthesized in water in the first polymerization step (Table S1).<sup>a</sup>

| Entry | $\alpha^b$<br>(%) | mol%<br>DMAc <sup>c</sup> | time<br>(min) | DMAc<br>conv.<br>(%) <sup>d</sup> | DAAM<br>conv.<br>(%) <sup>d</sup> | $DP_{n,th}^e$<br>(2 <sup>nd</sup> block) | $M_{n,th}^e$<br>(kg mol <sup>-1</sup> ) | $M_{n,PMMA}^f$<br>(kg mol <sup>-1</sup> ) | $\mathcal{D}^f$    | Stability   |
|-------|-------------------|---------------------------|---------------|-----------------------------------|-----------------------------------|------------------------------------------|-----------------------------------------|-------------------------------------------|--------------------|-------------|
| A     | 47                | 6.4                       | 120           | 93                                | 95                                | 188                                      | 40.8                                    | 41.3                                      | 1.59<br>(bi-modal) | Precipitate |
| B     | 85                | 6.4                       | 120           | 93                                | 97                                | 192                                      | 41.4                                    | 43.2                                      | 1.23               | Stable      |

<sup>a</sup> Polymerizations conditions: T = 70 °C, [monomers]<sub>0</sub> = 11 wt%, [monomers]<sub>0</sub>/[macroRAFT]<sub>0</sub> = 198,  $M_{n,NMR}$ (PDMAc I *tris*) = 9.8 kg mol<sup>-1</sup>, [PDMAc]<sub>0</sub> = 37 g L<sup>-1</sup> = 3.8 mmol L<sup>-1</sup>, [ACPA added in 2<sup>nd</sup> polymerization step]<sub>0</sub> = 0.77 mmol L<sup>-1</sup>. <sup>b</sup> Ionization degree of the central benzoic acid moiety of the PDMAc macroRAFT agent. <sup>c</sup> Molar percentage of DMAc in the second polymer block. mol% DMAc = [n(DMAc<sub>residual</sub>) + n(DMAc<sub>added</sub>)] / [n(DAAM) + n(DMAc<sub>residual</sub>) + n(DMAc<sub>added</sub>)] × 100. <sup>d</sup> Monomer conversion determined by <sup>1</sup>H NMR. <sup>e</sup> Theoretical number-average degree of polymerization,  $DP_{n,th}$ , and number-average molar mass,  $M_{n,th}$ , calculated using the experimental conversion and using  $M_{n,NMR}$  for the PDMAc block. <sup>f</sup> Number-average molar mass  $M_{n,PMMA}$  and dispersity,  $\mathcal{D}$ , determined by SEC in DMF (+ LiBr 1g L<sup>-1</sup>) with a PMMA calibration, see **Figure S3**.

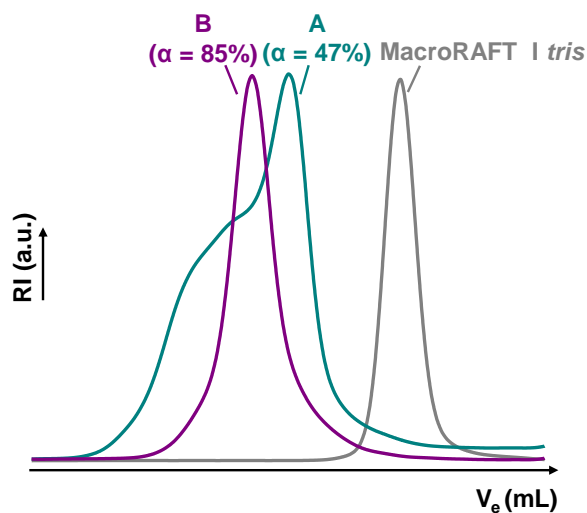

**Figure S3.** Normalized size exclusion chromatograms of PDMAc macroRAFT agent (entry I *tris* in **Table S1**) and the resulting  $[C_4\text{-P}(\text{DAAm-co-DMAc})\text{-}b\text{-PDMAc}]_2\text{-BA}$  copolymers A and B (**Table S2**) obtained by RAFT polymerization dispersion in water respectively at  $\alpha = 47$  and 85%.

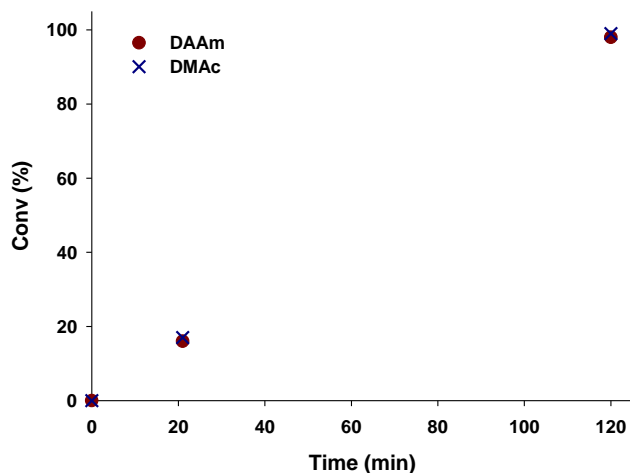

**Figure S4.** Monitoring of the individual conversion of DAAM and DMAc by  $^1\text{H}$  NMR during the chain-extension of PDMAc macroRAFT agent with DAAM and DMAc (33 mol% of DMAc), for experimental conditions see entry 80-100-33 in **Table 1**.

**Table S3.** Aqueous dispersion copolymerizations of DAAM and DMAc at  $\alpha = 85\%$  in the presence of PDMAc macroRAFT.<sup>a</sup>

| Entry                                                            | PDMAc MacroRAFT<br>(ref Table S1) | $M_{n,NMR}^b$<br>MacroRAFT<br>(kg mol <sup>-1</sup> ) | [macroRAFT] <sub>0</sub><br>(mmol L <sup>-1</sup> ) | [M <sub>tot</sub> ] <sub>0</sub> /<br>[macroRAFT] <sub>0</sub> | mol%<br>DMAc <sup>c</sup> | time<br>(min) | DMAc<br>conv.<br>(%) <sup>d</sup> | DAAM<br>conv.<br>(%) <sup>d</sup> | total<br>$DP_{n,e}$<br>(B blocks) | $M_{n,th}^e$<br>(kg mol <sup>-1</sup> ) | $M_{n,PMMA}^f$<br>(kg mol <sup>-1</sup> ) | $\mathcal{D}^f$ |
|------------------------------------------------------------------|-----------------------------------|-------------------------------------------------------|-----------------------------------------------------|----------------------------------------------------------------|---------------------------|---------------|-----------------------------------|-----------------------------------|-----------------------------------|-----------------------------------------|-------------------------------------------|-----------------|
| <b>Series I – <math>DP_{n,A \text{ block}} \sim 80</math></b>    |                                   |                                                       |                                                     |                                                                |                           |               |                                   |                                   |                                   |                                         |                                           |                 |
| 80-100-0*                                                        | I bis                             | 9.2                                                   | 7.8                                                 | 89                                                             | 0                         | 187           | -                                 | 97                                | 86                                | 23.8                                    | 17.5                                      | 1.23            |
| 80-100-20                                                        | I                                 | 8.2                                                   | 8.7                                                 | 109                                                            | 20                        | 120           | 100                               | 100                               | 108                               | 24.8                                    | 20.3                                      | 1.19            |
| 80-100-33                                                        | I                                 | 8.2                                                   | 8.9                                                 | 110                                                            | 33                        | 120           | 99                                | 98                                | 111                               | 24.1                                    | 20.9                                      | 1.18            |
| 80-100-50                                                        | I                                 | 8.2                                                   | 9.0                                                 | 112                                                            | 50                        | 124           | 98                                | 99                                | 111                               | 23.1                                    | 19.2                                      | 1.21            |
| 80-400-42                                                        | I                                 | 8.2                                                   | 2.8                                                 | 391                                                            | 42                        | 134           | 98                                | 100                               | 391                               | 63.2                                    | 54.3                                      | 1.23            |
| <b>Series II – <math>DP_{n,A \text{ block}} \sim 180</math></b>  |                                   |                                                       |                                                     |                                                                |                           |               |                                   |                                   |                                   |                                         |                                           |                 |
| 180-100-20                                                       | II                                | 18.5                                                  | 9.4                                                 | 96                                                             | 20                        | 120           | 85                                | 88                                | 96                                | 33.4                                    | 29.3                                      | 1.22            |
| 180-100-33                                                       | II bis                            | 18.4                                                  | 10.1                                                | 98                                                             | 33                        | 120           | 88                                | 90                                | 98                                | 32.8                                    | 25.0                                      | 1.21            |
| 180-100-50                                                       | II bis                            | 18.4                                                  | 11.2                                                | 106                                                            | 50                        | 120           | 94                                | 96                                | 105                               | 32.5                                    | 25.0                                      | 1.20            |
| 180-400-20                                                       | II bis                            | 18.4                                                  | 2.4                                                 | 390                                                            | 20                        | 137           | 100                               | 100                               | 390                               | 78.9                                    | 70.5                                      | 1.28            |
| 180-400-42                                                       | II                                | 18.5                                                  | 2.6                                                 | 391                                                            | 42                        | 120           | 98                                | 99                                | 391                               | 73.0                                    | 62.3                                      | 1.21            |
| <b>Series III – <math>DP_{n,A \text{ block}} \sim 400</math></b> |                                   |                                                       |                                                     |                                                                |                           |               |                                   |                                   |                                   |                                         |                                           |                 |
| 400-100-50                                                       | III                               | 39.6 <sup>g</sup>                                     | 4.1                                                 | 112                                                            | 50                        | 137           | 100                               | 100                               | 111                               | 54.9                                    | 46.6                                      | 1.17            |
| 400-400-42                                                       | III                               | 39.6 <sup>g</sup>                                     | 1.8                                                 | 388                                                            | 42                        | 137           | 100                               | 100                               | 388                               | 94.2                                    | 74.8                                      | 1.26            |

<sup>a</sup> Polymerization conditions: T = 70 °C, [monomers]<sub>0</sub> = 12 wt%,  $\alpha$  (BA) = 85% (corresponding to pH = 5), [ACPA added in the 2<sup>nd</sup> polymerization step]<sub>0</sub> = 0.76 mmol L<sup>-1</sup>. <sup>b</sup> Number-average molar mass  $M_{n,NMR}$  of PDMAc macroRAFT, determined by <sup>1</sup>H NMR. <sup>c</sup> Molar percentage of DMAc in the two B blocks. mol%DMAc =  $[n(\text{DMAc}_{\text{residual}}) + n(\text{DMAc}_{\text{added}})] / [n(\text{DAAM}) + n(\text{DMAc}_{\text{residual}}) + n(\text{DMAc}_{\text{added}})] \times 100$ . <sup>d</sup> Monomer conversion determined by <sup>1</sup>H NMR. <sup>e</sup> Total theoretical number-average degree of polymerization,  $DP_{n,B \text{ blocks}}$ , and number-average molar mass,  $M_{n,th}$ , calculated using the experimental conversion and using  $M_{n,NMR}$  for the PDMAc block. <sup>f</sup> Number-average molar mass  $M_{n,PMMA}$  and dispersity,  $\mathcal{D}$ , determined by SEC in DMF (+ LiBr 1g L<sup>-1</sup>) with a PMMA calibration. <sup>g</sup> Theoretical number-average molar mass  $M_{n,th}$  calculated using the experimental conversion. \* Not an all-water polymerization process (1<sup>st</sup> step in DMF).<sup>12</sup> BAB triblock copolymers are noted “X-Y-Z”, where “X” stands for the  $DP_{n,A \text{ block}}$  of PDMAc macroRAFT used, “Y” indicates the overall  $DP_{n,B \text{ blocks}}$  and “Z”, the mol% of DMAc in the hydrophobic block.

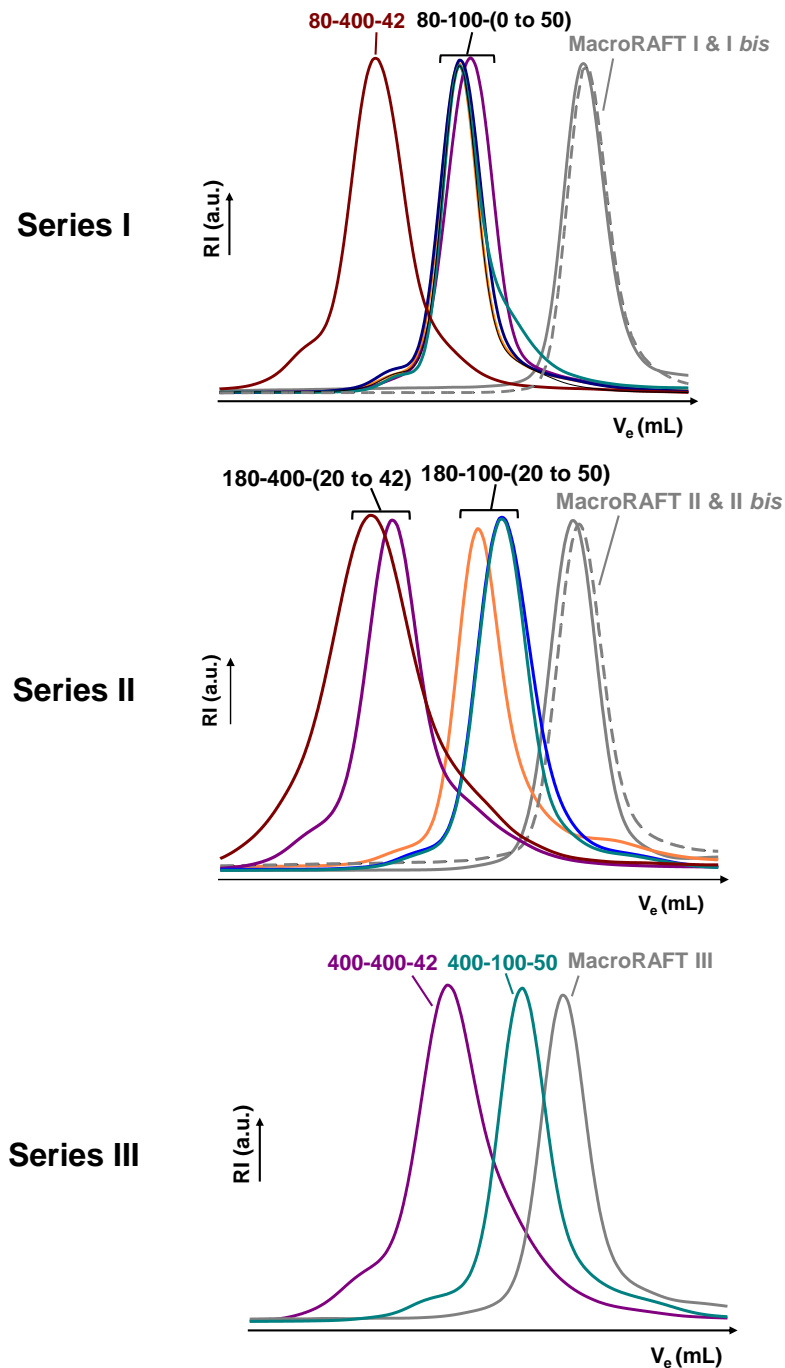

**Figure S5.** Normalized size exclusion chromatograms of PDMAc macroRAFT agents and the resulting  $[C_4\text{-P}(\text{DAAm}\text{-}co\text{-}\text{DMAc})\text{-}b\text{-PDMAc}]_2\text{-BA}$  copolymers obtained by RAFT dispersion polymerization in water of series **I** (with macroRAFT of  $DP_{n, A \text{ block}} \sim 80$ ), series **II** (with macroRAFT of  $DP_{n, A \text{ block}} \sim 180$ ) and series **III** (with macroRAFT of  $DP_{n, A \text{ block}} \sim 400$ ). See experimental conditions in **Table 1** and details in **Table S3**.

**Table S4.** Viscosity  $\eta$  in the Newtonian regime of triblock copolymers at 5 wt% in water and 30 °C.

| Sample            | $DP_n$ , PDMAc | mol% DMAc <sup>a</sup> | $\eta$ (Pa.s)             |
|-------------------|----------------|------------------------|---------------------------|
| <b>180-100-20</b> | 177            | 20                     | 0.309                     |
| <b>180-100-33</b> | 177            | 33                     | 0.054                     |
| <b>80-100-33</b>  | 79             | 33                     | $\leq 0.015$ <sup>b</sup> |

<sup>a</sup> Molar percentage of DMAc in the two B blocks; <sup>b</sup> The oil added on the geometry to limit water evaporation from the sample (see experimental section) causes an error on the measurement of very-low viscosity aqueous solutions. Indeed, the viscosity of water covered with this oil is also 0.015 Pa.s instead of 0.0008 Pa.s.<sup>38</sup> It follows that the viscosity of 80-100-33 at 5 wt% lies between 0.0008 and 0.015 Pa.s but cannot be measured more precisely. This information is sufficient to conclude though.

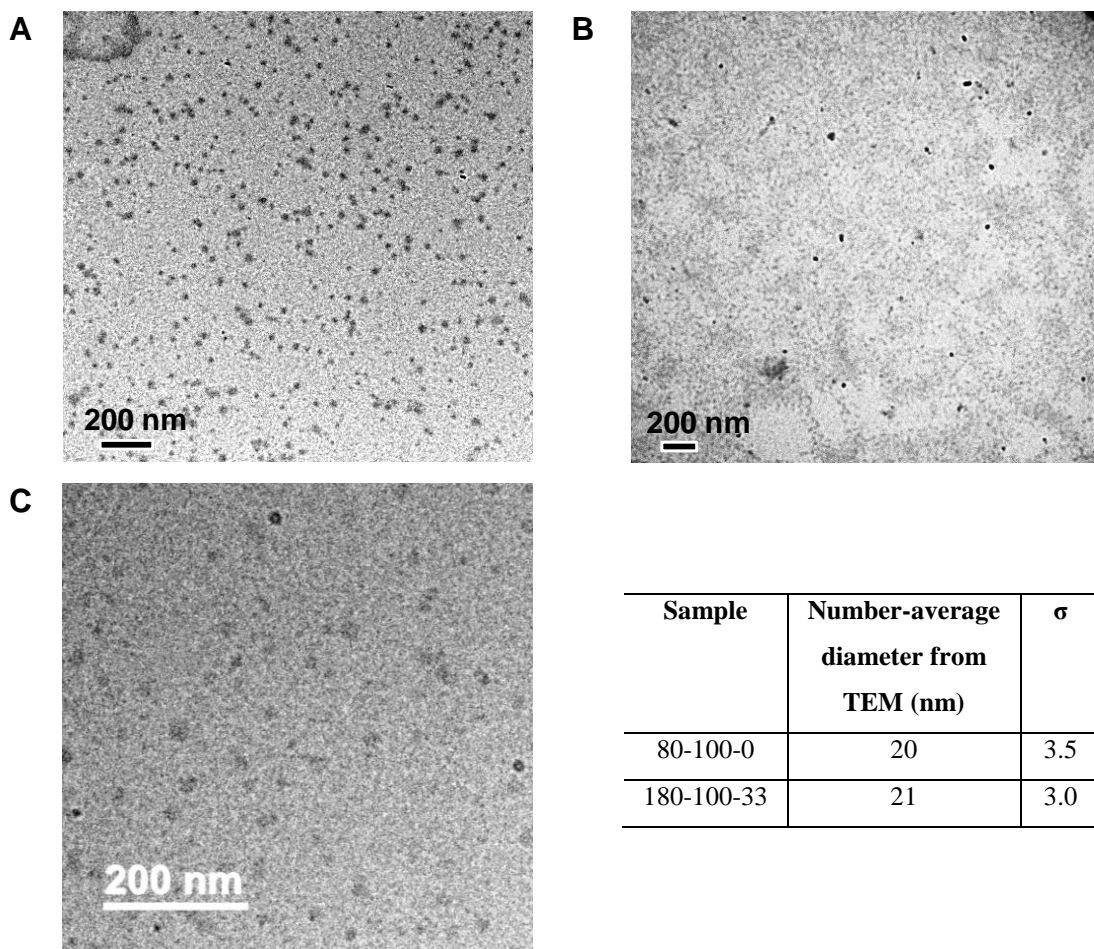

**Figure S6.** TEM images and number-average diameter ( $d_n$ ) of (A) sample 80-100-33 stained with phosphotungstic acid (0.05 wt%), and (B) sample 80-100-0. The samples were prepared at 25°C and 0.1wt%. Cryo-TEM image (C) for sample 180-100-33 (prepared at 25 °C and 1 wt%).

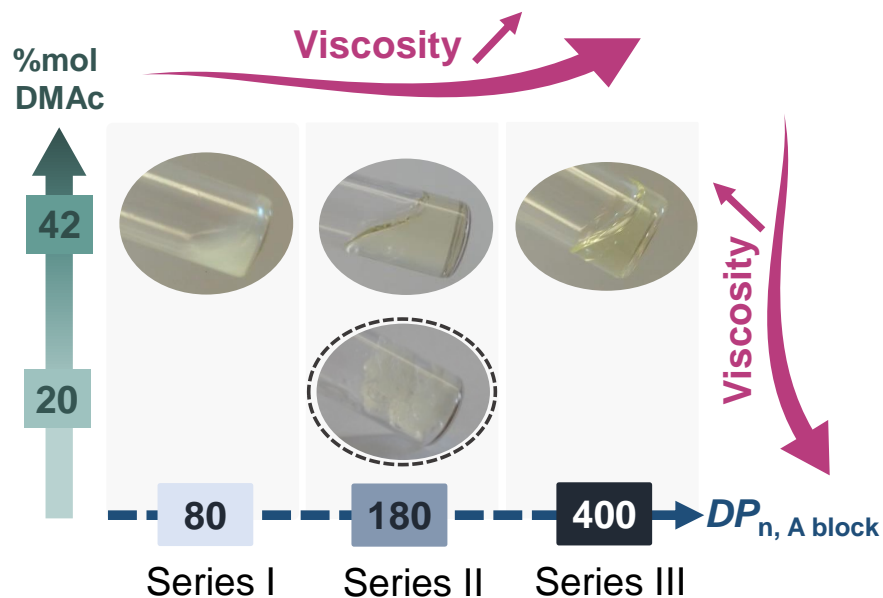

**Figure S7.** Macroscopic aspect of triblock copolymers with total  $DP_{n, B \text{ blocks}} \sim 400$  at 18 wt% in water at 25 °C observed 5s after vial tilting. The dotted circle indicates a gel-like dispersion.

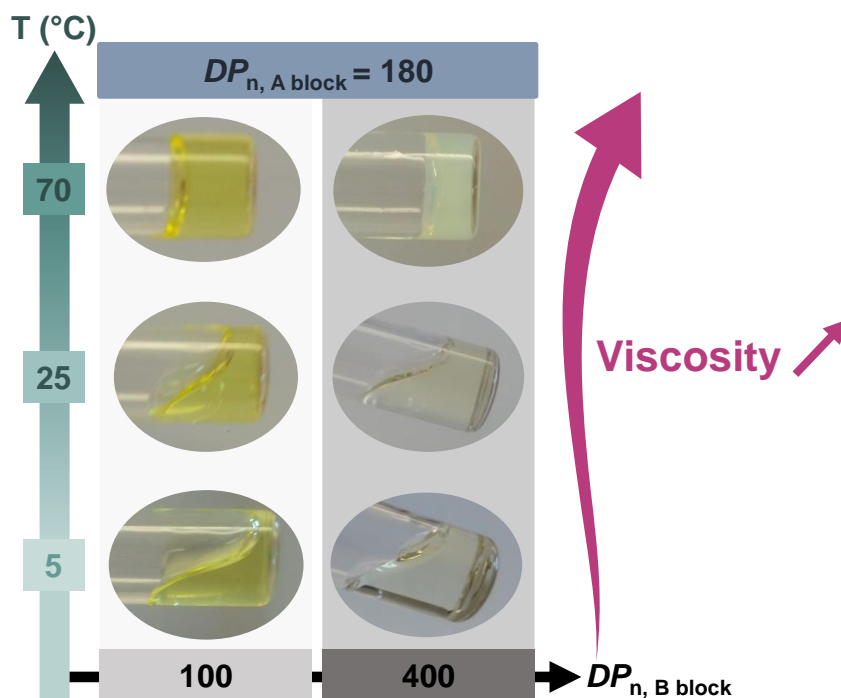

**Figure S8.** Macroscopic aspect at different temperatures for block copolymer dispersions 180-100-33 and 180-400-42 at  $C \sim 18$  wt% (see **Table 1**) observed 5s after vial tilting. Sample 180-100-33:  $DP_{n, A \text{ block}} \sim 180$ ,  $DP_{n, B \text{ blocks}} \sim 100$  with 33 mol% DMAc and sample 180-400-42:  $DP_{n, A \text{ block}} \sim 180$ ,  $DP_{n, B \text{ blocks}} \sim 400$  with 42 mol% DMAc.



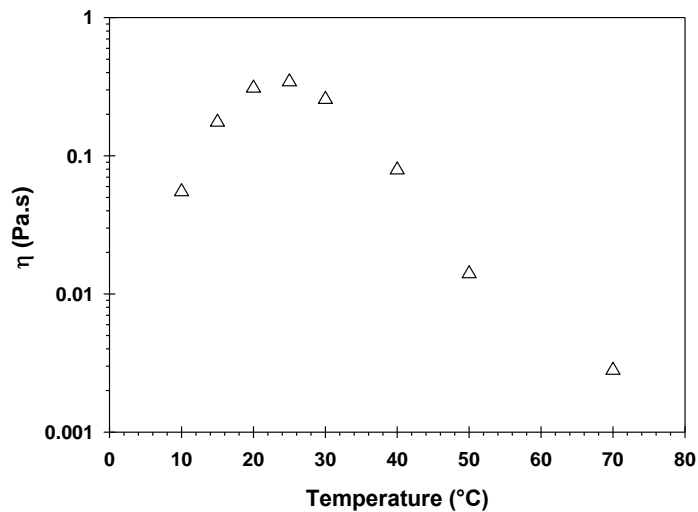

**Figure S9.** Temperature-dependency of the viscosity ( $\eta$ ) in the Newtonian regime at  $C = 5$  wt% for sample 180-100-20 ( $\Delta$ ). The solid lines are guides to the eye.

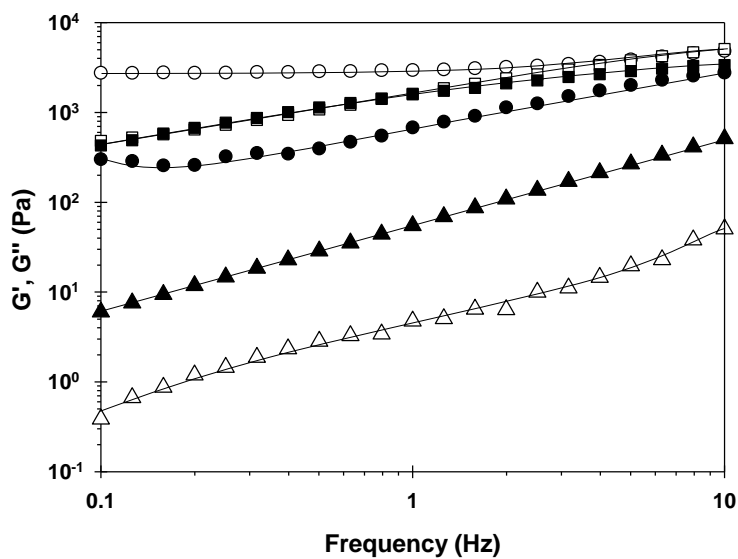

**Figure S10.** Frequency dependence of the storage and loss moduli for a 14 wt% dispersion of copolymer 180-100-33 at an applied strain of 1% and at different temperatures: 27 °C ( $G'$   $\Delta$  and  $G''$   $\blacktriangle$ ), 50 °C ( $G'$   $\circ$  and  $G''$   $\bullet$ ) and 70 °C ( $G'$   $\square$  and  $G''$   $\blacksquare$ ). The solid lines are guides to the eye.

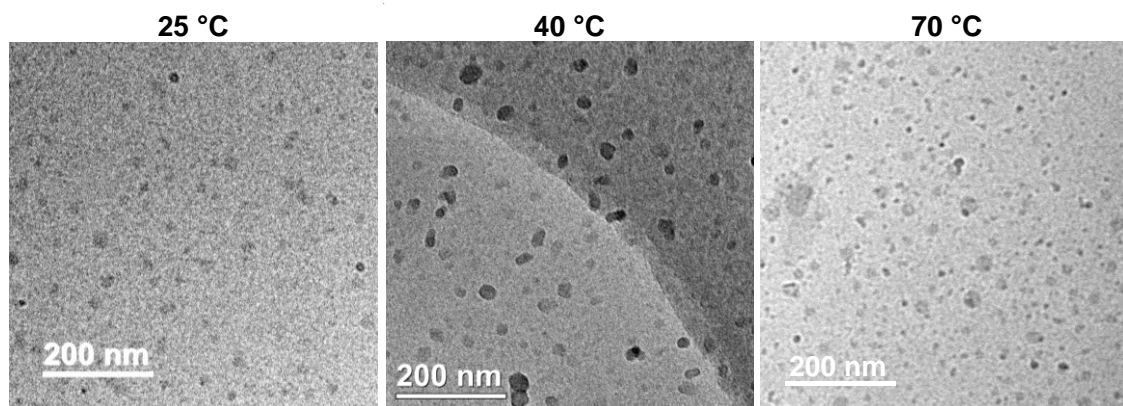

**Figure S11.** Cryo-TEM images prepared at 25, 40 and 70 °C of sample 180-100-33 (1 wt%).

**Table S5.** Number-average diameter,  $d_n$ , determined by cryo-TEM for sample 180-100-33 at 1 wt%.

| Sample            | Temp. (°C) <sup>a</sup> | $d_n$ (nm) <sup>b</sup> | $\sigma$ <sup>c</sup> |
|-------------------|-------------------------|-------------------------|-----------------------|
| <b>180-100-33</b> | 25°C                    | 22                      | 5.2                   |
|                   | 40°C                    | 21                      | 3.5                   |
|                   | 70°C                    | 27                      | 7.3                   |

<sup>a</sup> Temperature at which the sample was deposited on the TEM grid; <sup>b</sup> number-average diameter determined on more than 25 particles; <sup>c</sup> standard deviation

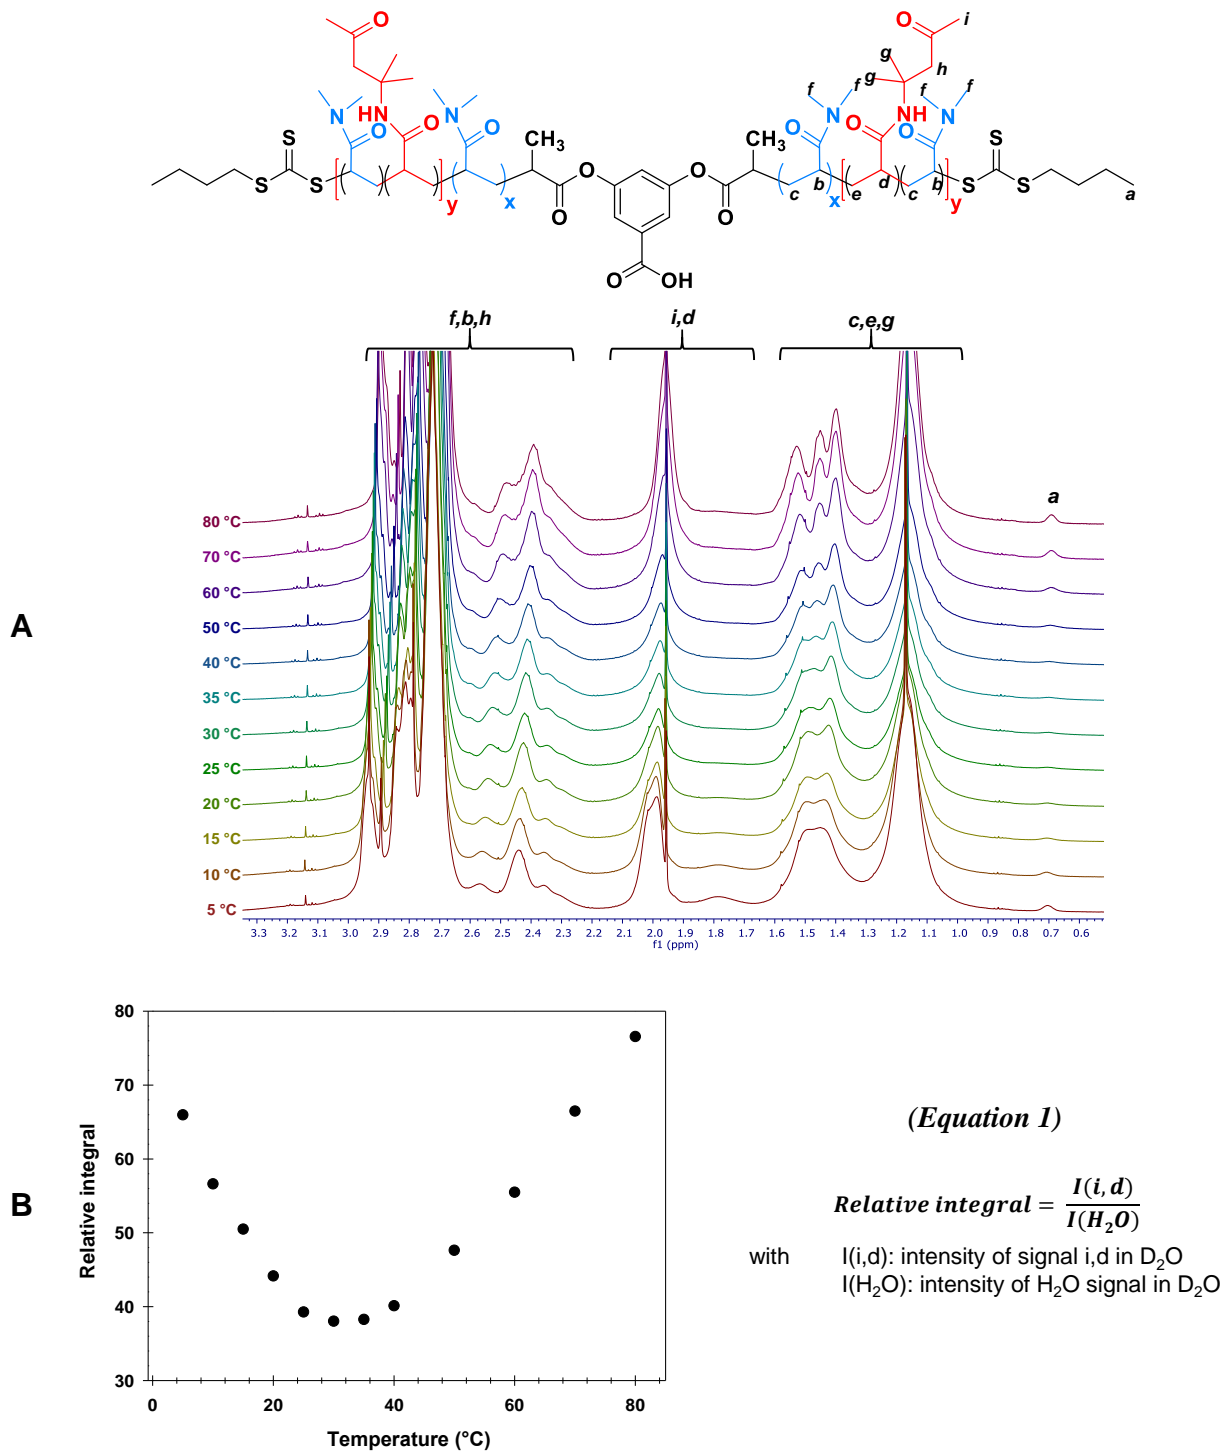

**Figure S12.** (A) Variable temperature  $^1\text{H}$  NMR study of a thermoresponsive BAB triblock copolymer (sample 180-100-33 in **Table 1**) in  $\text{D}_2\text{O}$  at 2.5 wt% upon heating from 5 °C to 80 °C. The signal intensity of protons  $i, d$  reaches a minimum at  $\sim 35$  °C which could be attributed to the minimum of mobility of the core-forming blocks B. (B) The relative integral of signal  $i, d$  is calculated according (*Equation 1*).

## References

<sup>1</sup> P. Biais, P. Beaunier, F. Stoffelbach and J. Rieger, *Polymer Chemistry*, 2018, **9**, 4483–4491.
